# Supplementary material for: Are electronic nicotine delivery systems helping cigarette smokers quit? Evidence from a prospective cohort study of U.S. adult smokers, 2015–2016
Source: PubMed Central journal article supplement (PMC6037369; doi:10.1371/journal.pone.0198047), 2018-07-09
Supplement: pone.0198047.s008.pdf [file pone.0198047.s008.pdf]

## Codebook

### CaseID

|                     |             | Value   |
|---------------------|-------------|---------|
| Standard Attributes | Label       | Case ID |
|                     | Measurement | Scale   |

### CGEV100

|                     |             | Value                                                                                                    |
|---------------------|-------------|----------------------------------------------------------------------------------------------------------|
| Standard Attributes | Label       | Have you smoked at least 100 cigarettes in your entire life? One hundred cigarettes is equal to 5 packs. |
|                     | Measurement | Nominal                                                                                                  |
| Valid Values        | 0           | No                                                                                                       |
|                     | 1           | Yes                                                                                                      |
| Missing Values      | -9          | Refused                                                                                                  |

### CGNOW

|                     |             | Value                                                            |
|---------------------|-------------|------------------------------------------------------------------|
| Standard Attributes | Label       | Do you now smoke cigarettes every day, some days, or not at all? |
|                     | Measurement | Nominal                                                          |
| Valid Values        | 0           | Not at all                                                       |
|                     | 1           | Some days                                                        |
|                     | 2           | Everyday                                                         |
| Missing Values      | -9          | Refused                                                          |

**CGFRQ30**

|                     |             | Value                                                               |
|---------------------|-------------|---------------------------------------------------------------------|
| Standard Attributes | Label       | During the past 30 days, on how many days did you smoke cigarettes? |
|                     | Measurement | Scale                                                               |
| Labeled Values      | -9          | Refused                                                             |

**CGDYQTY**

|                     |             | Value                                                                                                                   |
|---------------------|-------------|-------------------------------------------------------------------------------------------------------------------------|
| Standard Attributes | Label       | On average, on the days that you smoke, how many cigarettes a day do you smoke? A pack usually has 20 cigarettes in it. |
|                     | Measurement | Scale                                                                                                                   |
| Labeled Values      | -9          | Refused                                                                                                                 |

**CGSTAGE**

|                     |             | Value                                                                            |
|---------------------|-------------|----------------------------------------------------------------------------------|
| Standard Attributes | Label       | Think about the first time you smoked cigarettes. How old were you at that time? |
|                     | Measurement | Scale                                                                            |
| Labeled Values      | -9          | Refused                                                                          |

**CGQTPLN**

|                     |             | Value                                                                 |
|---------------------|-------------|-----------------------------------------------------------------------|
| Standard Attributes | Label       | What best describes your plans regarding quitting smoking cigarettes? |
|                     | Measurement | Nominal                                                               |
| Valid Values        | 1           | Intend to quit in the next 7 days                                     |
|                     | 2           | Intend to quit in the next month                                      |
|                     | 3           | Intend to quit in the next 6 months                                   |
|                     | 4           | Intend to quit in the next year                                       |
|                     | 5           | Intend to quit someday, but not within the next year                  |
|                     | 6           | Never plan to quit                                                    |
| Missing Values      | -9          | Refused                                                               |

**CGQTATPY**

|                     |             | Value                                                                                                |
|---------------------|-------------|------------------------------------------------------------------------------------------------------|
| Standard Attributes | Label       | In total, how many times in the past 12 months have you tried to quit smoking cigarettes completely? |
|                     | Measurement | Scale                                                                                                |
| Labeled Values      | -9          | Refused                                                                                              |

**CGQSE6**

|                     |             | Value                                                                                           |
|---------------------|-------------|-------------------------------------------------------------------------------------------------|
| Standard Attributes | Label       | [Used nicotine replacements]<br>Have you ever done any of the following to try to quit smoking? |
|                     | Measurement | Nominal                                                                                         |
| Valid Values        | 0           | No                                                                                              |
|                     | 1           | Yes                                                                                             |
| Missing Values      | -9          | Refused                                                                                         |

**ECFRQ30**

|                     |             | Value                                                                    |
|---------------------|-------------|--------------------------------------------------------------------------|
| Standard Attributes | Label       | On how many of the past 30 days have you used electronic vapor products? |
|                     | Measurement | Scale                                                                    |
| Labeled Values      | -9          | Refused                                                                  |

**ECNOW**

|                     |             | Value                                                                                 |
|---------------------|-------------|---------------------------------------------------------------------------------------|
| Standard Attributes | Label       | Do you now use electronic vapor products every day, some days, rarely, or not at all? |
|                     | Measurement | Nominal                                                                               |
| Valid Values        | 0           | Not at all                                                                            |
|                     | 1           | Rarely                                                                                |
|                     | 2           | Some days                                                                             |
|                     | 3           | Every day                                                                             |
| Missing Values      | -9          | Refused                                                                               |

**ECTYPRCH**

|                     |             | Value                                                                                                                             |
|---------------------|-------------|-----------------------------------------------------------------------------------------------------------------------------------|
| Standard Attributes | Label       | Please think about the electronic vapor product you use/used most of the time. Is/Was your electronic vapor product rechargeable? |
|                     | Measurement | Nominal                                                                                                                           |
| Valid Values        | 0           | No                                                                                                                                |
|                     | 1           | Yes                                                                                                                               |
|                     | 9           | Don't know                                                                                                                        |
| Missing Values      | -9          | Refused                                                                                                                           |

**ECTYPCRT**

|                     |             | Value                                                  |
|---------------------|-------------|--------------------------------------------------------|
| Standard Attributes | Label       | Does/Did your electronic vapor product use cartridges? |
|                     | Measurement | Nominal                                                |
| Valid Values        | 0           | No                                                     |
|                     | 1           | Yes                                                    |
|                     | 9           | Don't know                                             |
| Missing Values      | -9          | Refused                                                |

**ECTYPTNK**

|                     |             | Value                                                     |
|---------------------|-------------|-----------------------------------------------------------|
| Standard Attributes | Label       | Does/Did your electronic vapor product use a tank system? |
|                     | Measurement | Nominal                                                   |
| Valid Values        | 0           | No                                                        |
|                     | 1           | Yes                                                       |
|                     | 2           | Not sure                                                  |
| Missing Values      | -9          | Refused                                                   |

**ECFFLV30**

|                     |             | Value                                                                                                      |
|---------------------|-------------|------------------------------------------------------------------------------------------------------------|
| Standard Attributes | Label       | In the past 30 days, have you used electronic vapor products that are flavored (including tobacco flavor)? |
|                     | Measurement | Nominal                                                                                                    |
| Valid Values        | 0           | No                                                                                                         |
|                     | 1           | Yes                                                                                                        |
| Missing Values      | -9          | Refused                                                                                                    |

**ECFL30\_1**

|                     |             | Value                                                                                                         |
|---------------------|-------------|---------------------------------------------------------------------------------------------------------------|
| Standard Attributes | Label       | [Mint, Wintergreen, Menthol]<br>Which flavors have you used in electronic vapor products in the past 30 days? |
|                     | Measurement | Nominal                                                                                                       |
| Valid Values        | 0           | No                                                                                                            |
|                     | 1           | Yes                                                                                                           |
| Missing Values      | -9          | Refused                                                                                                       |

**ECFL30\_2**

|                     |             | Value                                                                                                                                                    |
|---------------------|-------------|----------------------------------------------------------------------------------------------------------------------------------------------------------|
| Standard Attributes | Label       | [Fruit (e.g. cherry, blueberry, strawberry, watermelon, coconut, etc.)]<br>Which flavors have you used in electronic vapor products in the past 30 days? |
|                     | Measurement | Nominal                                                                                                                                                  |
| Valid Values        | 0           | No                                                                                                                                                       |
|                     | 1           | Yes                                                                                                                                                      |
| Missing Values      | -9          | Refused                                                                                                                                                  |

**ECFL30\_3**

|                     |             | Value                                                                                                                                                          |
|---------------------|-------------|----------------------------------------------------------------------------------------------------------------------------------------------------------------|
| Standard Attributes | Label       | [Coffee (coffee or any related flavor - e.g. espresso, latte, cappuccino, etc.)] Which flavors have you used in electronic vapor products in the past 30 days? |
|                     | Measurement | Nominal                                                                                                                                                        |
| Valid Values        | 0           | No                                                                                                                                                             |
|                     | 1           | Yes                                                                                                                                                            |
| Missing Values      | -9          | Refused                                                                                                                                                        |

**ECFL30\_4**

|                     |             | Value                                                                                                                                                           |
|---------------------|-------------|-----------------------------------------------------------------------------------------------------------------------------------------------------------------|
| Standard Attributes | Label       | [Candy or dessert flavors (e.g. caramel, vanilla, chocolate, ice cream, mud pie)] Which flavors have you used in electronic vapor products in the past 30 days? |
|                     | Measurement | Nominal                                                                                                                                                         |
| Valid Values        | 0           | No                                                                                                                                                              |
|                     | 1           | Yes                                                                                                                                                             |
| Missing Values      | -9          | Refused                                                                                                                                                         |



**ECFL30\_5**

|                     |             | Value                                                                                                                   |
|---------------------|-------------|-------------------------------------------------------------------------------------------------------------------------|
| Standard Attributes | Label       | [Spice (e.g. clove, cinnamon, nutmeg)]<br>Which flavors have you used in electronic vapor products in the past 30 days? |
|                     | Measurement | Nominal                                                                                                                 |
| Valid Values        | 0           | No                                                                                                                      |
|                     | 1           | Yes                                                                                                                     |
| Missing Values      | -9          | Refused                                                                                                                 |

**ECFL30\_6**

|                     |             | Value                                                                                                                                                                               |
|---------------------|-------------|-------------------------------------------------------------------------------------------------------------------------------------------------------------------------------------|
| Standard Attributes | Label       | [Alcohol or cocktail (e.g. wine, bourbon, rum, brandy, tequila, whiskey, beer, mai-tai, daiquiri)]<br>Which flavors have you used in electronic vapor products in the past 30 days? |
|                     | Measurement | Nominal                                                                                                                                                                             |
| Valid Values        | 0           | No                                                                                                                                                                                  |
|                     | 1           | Yes                                                                                                                                                                                 |
| Missing Values      | -9          | Refused                                                                                                                                                                             |

**ECFL30\_7**

|                     |             | Value                                                                                          |
|---------------------|-------------|------------------------------------------------------------------------------------------------|
| Standard Attributes | Label       | [Tobacco flavor] Which flavors have you used in electronic vapor products in the past 30 days? |
|                     | Measurement | Nominal                                                                                        |
| Valid Values        | 0           | No                                                                                             |
|                     | 1           | Yes                                                                                            |
| Missing Values      | -9          | Refused                                                                                        |

**ECFL30\_9**

|                     |             | Value                                                                                             |
|---------------------|-------------|---------------------------------------------------------------------------------------------------|
| Standard Attributes | Label       | [Some other flavor] Which flavors have you used in electronic vapor products in the past 30 days? |
|                     | Measurement | Nominal                                                                                           |
| Valid Values        | 0           | No                                                                                                |
|                     | 1           | Yes                                                                                               |
| Missing Values      | -9          | Refused                                                                                           |

**LCNOW**

|                     |             | Value                                                                                                     |
|---------------------|-------------|-----------------------------------------------------------------------------------------------------------|
| Standard Attributes | Label       | Do you now use little cigars, cigarillos, or filtered cigars every day, some days, rarely, or not at all? |
|                     | Measurement | Nominal                                                                                                   |
| Valid Values        | 0           | Not at all                                                                                                |
|                     | 1           | Rarely                                                                                                    |
|                     | 2           | Some days                                                                                                 |
|                     | 3           | Every day                                                                                                 |
| Missing Values      | -9          | Refused                                                                                                   |

**TCNOW**

|                     |             | Value                                                                            |
|---------------------|-------------|----------------------------------------------------------------------------------|
| Standard Attributes | Label       | Do you now smoke traditional cigars every day, some days, rarely, or not at all? |
|                     | Measurement | Nominal                                                                          |
| Valid Values        | 0           | Not at all                                                                       |
|                     | 1           | Rarely                                                                           |
|                     | 2           | Some days                                                                        |
|                     | 3           | Every day                                                                        |
| Missing Values      | -9          | Refused                                                                          |

**HKNOW**

|                     |             | Value                                                               |
|---------------------|-------------|---------------------------------------------------------------------|
| Standard Attributes | Label       | Do you now use hookahs every day, some days, rarely, or not at all? |
|                     | Measurement | Nominal                                                             |
| Valid Values        | 0           | Not at all                                                          |
|                     | 1           | Rarely                                                              |
|                     | 2           | Some days                                                           |
|                     | 3           | Every day                                                           |
| Missing Values      | -9          | Refused                                                             |

**CGCRAVE**

|                     |             | Value                                                 |
|---------------------|-------------|-------------------------------------------------------|
| Standard Attributes | Label       | Do you ever have strong cravings to smoke cigarettes? |
|                     | Measurement | Nominal                                               |
| Valid Values        | 0           | No                                                    |
|                     | 1           | Yes                                                   |
|                     | 9           | Don't know                                            |
| Missing Values      | -9          | Refused                                               |

**CGADSF**

|                     |             | Value                                            |
|---------------------|-------------|--------------------------------------------------|
| Standard Attributes | Label       | Do you consider yourself addicted to cigarettes? |
|                     | Measurement | Nominal                                          |
| Valid Values        | 0           | Not at all                                       |
|                     | 1           | Yes, somewhat addicted                           |
|                     | 2           | Yes, very addicted                               |
|                     | 9           | I don't know                                     |
| Missing Values      | -9          | Refused                                          |

**CGREG**

|                     |             | Value                                                                                                                             |
|---------------------|-------------|-----------------------------------------------------------------------------------------------------------------------------------|
| Standard Attributes | Label       | If I had it to do over again, I would not have started smoking cigarettes. How much do you agree or disagree with this statement? |
|                     | Measurement | Nominal                                                                                                                           |
| Valid Values        | -2          | Strongly disagree                                                                                                                 |
|                     | -1          | Somewhat disagree                                                                                                                 |
|                     | 0           | Neither disagree nor agree                                                                                                        |
|                     | 1           | Somewhat agree                                                                                                                    |
|                     | 2           | Strongly agree                                                                                                                    |
| Missing Values      | -9          | Refused                                                                                                                           |

**ECRESN4**

|                     |             | Value                                                                                                                                                                                  |
|---------------------|-------------|----------------------------------------------------------------------------------------------------------------------------------------------------------------------------------------|
| Standard Attributes | Label       | [Electronic vapor products could help me quit smoking regular cigarettes] For each reason listed, please indicate how important it is to you in your use of electronic vapor products. |
|                     | Measurement | Nominal                                                                                                                                                                                |
| Valid Values        | 0           | Not at all important                                                                                                                                                                   |
|                     | 1           | 1                                                                                                                                                                                      |
|                     | 2           | 2                                                                                                                                                                                      |
|                     | 3           | 3                                                                                                                                                                                      |
|                     | 4           | 4                                                                                                                                                                                      |
|                     | 5           | 5                                                                                                                                                                                      |
|                     | 6           | Very important                                                                                                                                                                         |
| Missing Values      | -9          | Refused                                                                                                                                                                                |

**PPAGE**

|                     |             | Value     |
|---------------------|-------------|-----------|
| Standard Attributes | Label       | Age       |
|                     | Measurement | Scale     |
| Labeled Values      | -2          | Not asked |
|                     | -1          | REFUSED   |

PPEDUC

|                     |             | Value                                                                         |
|---------------------|-------------|-------------------------------------------------------------------------------|
| Standard Attributes | Label       | Education (Highest Degree Received)                                           |
|                     | Measurement | Nominal                                                                       |
| Valid Values        | 1           | No formal education                                                           |
|                     | 2           | 1st, 2nd, 3rd, or 4th grade                                                   |
|                     | 3           | 5th or 6th grade                                                              |
|                     | 4           | 7th or 8th grade                                                              |
|                     | 5           | 9th grade                                                                     |
|                     | 6           | 10th grade                                                                    |
|                     | 7           | 11th grade                                                                    |
|                     | 8           | 12th grade                                                                    |
|                     | 9           | NO DIPLOMA HIGH SCHOOL GRADUATE - high school DIPLOMA or the equivalent (GED) |
|                     | 10          | Some college, no degree                                                       |
|                     | 11          | Associate degree                                                              |
|                     | 12          | Bachelors degree                                                              |
|                     | 13          | Masters degree                                                                |
|                     | 14          | Professional or Doctorate degree                                              |
| Missing Values      | -2          | Not asked                                                                     |
|                     | -1          | REFUSED                                                                       |

**PPETHM**

|                     |             | Value                  |
|---------------------|-------------|------------------------|
| Standard Attributes | Label       | Race / Ethnicity       |
|                     | Measurement | Nominal                |
| Valid Values        | 1           | White, Non-Hispanic    |
|                     | 2           | Black, Non-Hispanic    |
|                     | 3           | Other, Non-Hispanic    |
|                     | 4           | Hispanic               |
|                     | 5           | 2+ Races, Non-Hispanic |
| Missing Values      | -2          | Not asked              |
|                     | -1          | REFUSED                |

**PPGENDER**

|                     |             | Value     |
|---------------------|-------------|-----------|
| Standard Attributes | Label       | Gender    |
|                     | Measurement | Nominal   |
| Valid Values        | 1           | Male      |
|                     | 2           | Female    |
| Missing Values      | -2          | Not asked |
|                     | -1          | REFUSED   |



**PPINCIMP**

|                     |             | Value                  |
|---------------------|-------------|------------------------|
| Standard Attributes | Label       | Household Income       |
|                     | Measurement | Scale                  |
| Labeled Values      | -2          | Not asked              |
|                     | -1          | REFUSED                |
|                     | 1           | Less than \$5,000      |
|                     | 2           | \$5,000 to \$7,499     |
|                     | 3           | \$7,500 to \$9,999     |
|                     | 4           | \$10,000 to \$12,499   |
|                     | 5           | \$12,500 to \$14,999   |
|                     | 6           | \$15,000 to \$19,999   |
|                     | 7           | \$20,000 to \$24,999   |
|                     | 8           | \$25,000 to \$29,999   |
|                     | 9           | \$30,000 to \$34,999   |
|                     | 10          | \$35,000 to \$39,999   |
|                     | 11          | \$40,000 to \$49,999   |
|                     | 12          | \$50,000 to \$59,999   |
|                     | 13          | \$60,000 to \$74,999   |
|                     | 14          | \$75,000 to \$84,999   |
|                     | 15          | \$85,000 to \$99,999   |
|                     | 16          | \$100,000 to \$124,999 |
|                     | 17          | \$125,000 to \$149,999 |
|                     | 18          | \$150,000 to \$174,999 |
|                     | 19          | \$175,000 or more      |

**PPMARIT**

|                     |             | Value               |
|---------------------|-------------|---------------------|
| Standard Attributes | Label       | Marital Status      |
|                     | Measurement | Nominal             |
| Valid Values        | 1           | Married             |
|                     | 2           | Widowed             |
|                     | 3           | Divorced            |
|                     | 4           | Separated           |
|                     | 5           | Never married       |
|                     | 6           | Living with partner |
| Missing Values      | -2          | Not asked           |
|                     | -1          | REFUSED             |

**PPMSACAT**

|                     |             | Value      |
|---------------------|-------------|------------|
| Standard Attributes | Label       | MSA Status |
|                     | Measurement | Scale      |
| Labeled Values      | -2          | Not asked  |
|                     | -1          | REFUSED    |
|                     | 0           | Non-Metro  |
|                     | 1           | Metro      |

**PPREG4**

|                     |             | Value                                           |
|---------------------|-------------|-------------------------------------------------|
| Standard Attributes | Label       | Region 4 -<br>Based on<br>State of<br>Residence |
|                     | Measurement | Nominal                                         |
| Valid Values        | 1           | Northeast                                       |
|                     | 2           | Midwest                                         |
|                     | 3           | South                                           |
|                     | 4           | West                                            |
| Missing Values      | -2          | Not asked                                       |
|                     | -1          | REFUSED                                         |

**PPT01**

|                     |             | Value                                        |
|---------------------|-------------|----------------------------------------------|
| Standard Attributes | Label       | Presence of Household Members - Children 0-1 |
|                     | Measurement | Scale                                        |
| Labeled Values      | -2          | Not asked                                    |
|                     | -1          | REFUSED                                      |

**PPT25**

|                     |             | Value                                        |
|---------------------|-------------|----------------------------------------------|
| Standard Attributes | Label       | Presence of Household Members - Children 2-5 |
|                     | Measurement | Scale                                        |
| Labeled Values      | -2          | Not asked                                    |
|                     | -1          | REFUSED                                      |

**PPT612**

|                     |             | Value                                         |
|---------------------|-------------|-----------------------------------------------|
| Standard Attributes | Label       | Presence of Household Members - Children 6-12 |
|                     | Measurement | Scale                                         |
| Labeled Values      | -2          | Not asked                                     |
|                     | -1          | REFUSED                                       |

**PPT1317**

|                     |             | Value                                          |
|---------------------|-------------|------------------------------------------------|
| Standard Attributes | Label       | Presence of Household Members - Children 13-17 |
|                     | Measurement | Scale                                          |
| Labeled Values      | -2          | Not asked                                      |
|                     | -1          | REFUSED                                        |

**PPWORK**

|                     |             | Value                                        |
|---------------------|-------------|----------------------------------------------|
| Standard Attributes | Label       | Current Employment Status                    |
|                     | Measurement | Nominal                                      |
| Valid Values        | 1           | Working - as a paid employee                 |
|                     | 2           | Working - self-employed                      |
|                     | 3           | Not working - on temporary layoff from a job |
|                     | 4           | Not working - looking for work               |
|                     | 5           | Not working - retired                        |
|                     | 6           | Not working - disabled                       |
|                     | 7           | Not working - other                          |
| Missing Values      | -2          | Not asked                                    |
|                     | -1          | REFUSED                                      |

**ppp20063**

|                     |             | Value                                      |
|---------------------|-------------|--------------------------------------------|
| Standard Attributes | Label       | Q23: Do you consider yourself to be.<br>.. |
|                     | Measurement | Nominal                                    |
| Valid Values        | 1           | Heterosexual or straight                   |
|                     | 2           | Gay                                        |
|                     | 3           | Lesbian                                    |
|                     | 4           | Bisexual                                   |
|                     | 5           | Other, please specify                      |
| Missing Values      | -2          | Not asked                                  |
|                     | -1          | Refused                                    |

**pph10001**

|                     |             | Value                                                        |
|---------------------|-------------|--------------------------------------------------------------|
| Standard Attributes | Label       | Q1: In general, would you say your physical health is. . . ? |
|                     | Measurement | Nominal                                                      |
| Valid Values        | 1           | Excellent                                                    |
|                     | 2           | Very good                                                    |
|                     | 3           | Good                                                         |
|                     | 4           | Fair                                                         |
|                     | 5           | Poor                                                         |
| Missing Values      | -2          | Not asked                                                    |
|                     | -1          | Refused                                                      |

**pph1brea**

|                     |             | Value                                                                                                           |
|---------------------|-------------|-----------------------------------------------------------------------------------------------------------------|
| Standard Attributes | Label       | Q19: Have you been diagnosed with any of the following medical conditions? [Asthma, chronic bronchitis or COPD] |
|                     | Measurement | Nominal                                                                                                         |
| Valid Values        | 0           | No                                                                                                              |
|                     | 1           | Yes                                                                                                             |
| Missing Values      | -2          | Not asked                                                                                                       |
|                     | -1          | Refused                                                                                                         |

**smkstudies**

|                     |             | Value                                            |
|---------------------|-------------|--------------------------------------------------|
| Standard Attributes | Label       | # of smoking studies completed since August 2014 |
|                     | Measurement | Nominal                                          |
| Valid Values        | 0           | 0 surveys                                        |
|                     | 1           | 1 survey                                         |
|                     | 2           | 2-5 surveys                                      |
|                     | 3           | 6+ surveys                                       |

**pph10304**

|                     |             | Value                                                                                |
|---------------------|-------------|--------------------------------------------------------------------------------------|
| Standard Attributes | Label       | Q39: Which of the following have you had to drink in the past month? [None of these] |
|                     | Measurement | Nominal                                                                              |
| Valid Values        | 0           | No                                                                                   |
|                     | 1           | Yes                                                                                  |
| Missing Values      | -2          | Not asked                                                                            |
|                     | -1          | Refused                                                                              |

**pph10218**

|                     |             | Value                                                                                                          |
|---------------------|-------------|----------------------------------------------------------------------------------------------------------------|
| Standard Attributes | Label       | Q34: Have you ever in your life seen a psychiatrist, psychologist, or social worker for counseling or therapy? |
|                     | Measurement | Nominal                                                                                                        |
| Valid Values        | 1           | Yes                                                                                                            |
|                     | 2           | No                                                                                                             |
| Missing Values      | -2          | Not asked                                                                                                      |
|                     | -1          | Refused                                                                                                        |

**weight**

|                     |             | Value                            |
|---------------------|-------------|----------------------------------|
| Standard Attributes | Label       | Sample weights: 2016 respondents |
|                     | Measurement | Scale                            |

**QFLAG\_2**

|                     |             | Value                   |
|---------------------|-------------|-------------------------|
| Standard Attributes | Label       | DOV: Qualification Flag |
|                     | Measurement | Nominal                 |
| Valid Values        | 1           | Qualified               |
|                     | 2           | Not Qualified           |
|                     | 3           | Break-offs              |
|                     | 4           | Non-responders          |

**CGNOW\_2**

|                     |             | Value                                                            |
|---------------------|-------------|------------------------------------------------------------------|
| Standard Attributes | Label       | Do you now smoke cigarettes every day, some days, or not at all? |
|                     | Measurement | Nominal                                                          |
| Valid Values        | 0           | Not at all                                                       |
|                     | 1           | Some days                                                        |
|                     | 2           | Every day                                                        |
| Missing Values      | -9          | Refused                                                          |

**CGUSE30\_2**

|                     |             | Value                                                                    |
|---------------------|-------------|--------------------------------------------------------------------------|
| Standard Attributes | Label       | In the past 30 days, have you smoked a cigarette, even one or two puffs? |
|                     | Measurement | Nominal                                                                  |
| Valid Values        | 0           | No                                                                       |
|                     | 1           | Yes                                                                      |
| Missing Values      | -9          | Refused                                                                  |

**CGFRQ30\_2**

|                     |             | Value                                                               |
|---------------------|-------------|---------------------------------------------------------------------|
| Standard Attributes | Label       | During the past 30 days, on how many days did you smoke cigarettes? |
|                     | Measurement | Scale                                                               |
| Labeled Values      | -9          | Refused                                                             |

**CGDYQTY\_2**

|                     |             | Value                                                                                                                   |
|---------------------|-------------|-------------------------------------------------------------------------------------------------------------------------|
| Standard Attributes | Label       | On average, on the days that you smoke, how many cigarettes a day do you smoke? A pack usually has 20 cigarettes in it. |
|                     | Measurement | Scale                                                                                                                   |
| Labeled Values      | -9          | Refused                                                                                                                 |



**ECUSE30\_2**

|                     |             | Value                                                                                                                                                                                         |
|---------------------|-------------|-----------------------------------------------------------------------------------------------------------------------------------------------------------------------------------------------|
| Standard Attributes | Label       | In the past 30 days, have you used electronic vapor products (such as e-cigarettes, e-cigars, e-hookahs, e-pipes, vape pens, hookah pens or personal vaporizers/mods), even one or two times? |
|                     | Measurement | Nominal                                                                                                                                                                                       |
| Valid Values        | 0           | No                                                                                                                                                                                            |
|                     | 1           | Yes                                                                                                                                                                                           |
| Missing Values      | -9          | Refused                                                                                                                                                                                       |

**ECFRQ30\_2**

|                     |             | Value                                                                            |
|---------------------|-------------|----------------------------------------------------------------------------------|
| Standard Attributes | Label       | During the past 30 days, on how many days did you use electronic vapor products? |
|                     | Measurement | Scale                                                                            |
| Labeled Values      | -9          | Refused                                                                          |

**ECUSEYR\_2**

|                     |             | Value                                                                                |
|---------------------|-------------|--------------------------------------------------------------------------------------|
| Standard Attributes | Label       | Since August 2015, have you used an electronic vapor product, even one or two times? |
|                     | Measurement | Nominal                                                                              |
| Valid Values        | 0           | No                                                                                   |
|                     | 1           | Yes                                                                                  |
| Missing Values      | -9          | Refused                                                                              |

**ECNOW\_2**

|                     |             | Value                                                                                 |
|---------------------|-------------|---------------------------------------------------------------------------------------|
| Standard Attributes | Label       | Do you now use electronic vapor products every day, some days, rarely, or not at all? |
|                     | Measurement | Nominal                                                                               |
| Valid Values        | 0           | Not at all                                                                            |
|                     | 1           | Rarely                                                                                |
|                     | 2           | Some days                                                                             |
|                     | 3           | Every day                                                                             |
| Missing Values      | -9          | Refused                                                                               |

**ECTYPRCH\_2**

|                     |             | Value                                                                                                                                 |
|---------------------|-------------|---------------------------------------------------------------------------------------------------------------------------------------|
| Standard Attributes | Label       | Please think about the electronic vapor product you [use/used] most of the time. [Is/Was] your electronic vapor product rechargeable? |
|                     | Measurement | Nominal                                                                                                                               |
| Valid Values        | 0           | No                                                                                                                                    |
|                     | 1           | Yes                                                                                                                                   |
|                     | 9           | Don't know                                                                                                                            |
| Missing Values      | -9          | Refused                                                                                                                               |

**ECTYPCRT\_2**

|                     |             | Value                                                    |
|---------------------|-------------|----------------------------------------------------------|
| Standard Attributes | Label       | [Does/Did] your electronic vapor product use cartridges? |
|                     | Measurement | Nominal                                                  |
| Valid Values        | 0           | No                                                       |
|                     | 1           | Yes                                                      |
|                     | 9           | Don't know                                               |
| Missing Values      | -9          | Refused                                                  |

**ECTYPTNK\_2**

|                     |             | Value                                                       |
|---------------------|-------------|-------------------------------------------------------------|
| Standard Attributes | Label       | [Does/Did] your electronic vapor product use a tank system? |
|                     | Measurement | Nominal                                                     |
| Valid Values        | 0           | No                                                          |
|                     | 1           | Yes                                                         |
|                     | 9           | Don't know                                                  |
| Missing Values      | -9          | Refused                                                     |

**ECFLV\_2\_1**

|                     |             | Value                                                                                                                                                         |
|---------------------|-------------|---------------------------------------------------------------------------------------------------------------------------------------------------------------|
| Standard Attributes | Label       | [Mint, Wintergreen, Menthol] When you now use an electronic vapor product/When you last used an electronic vapor product, what flavor(s) did you usually use? |
|                     | Measurement | Nominal                                                                                                                                                       |
| Valid Values        | 0           | No                                                                                                                                                            |
|                     | 1           | Yes                                                                                                                                                           |
| Missing Values      | -9          | Refused                                                                                                                                                       |

**ECFLV\_2\_2**

|                     |             | Value                                                                                                                                                                                                    |
|---------------------|-------------|----------------------------------------------------------------------------------------------------------------------------------------------------------------------------------------------------------|
| Standard Attributes | Label       | [Fruit (e.g. cherry, blueberry, strawberry, watermelon, coconut, etc.)] When you now use an electronic vapor product/When you last used an electronic vapor product, what flavor(s) did you usually use? |
|                     | Measurement | Nominal                                                                                                                                                                                                  |
| Valid Values        | 0           | No                                                                                                                                                                                                       |
|                     | 1           | Yes                                                                                                                                                                                                      |
| Missing Values      | -9          | Refused                                                                                                                                                                                                  |

**ECFLV\_2\_3**

|                     |             | Value                                                                                                                                                                                                             |
|---------------------|-------------|-------------------------------------------------------------------------------------------------------------------------------------------------------------------------------------------------------------------|
| Standard Attributes | Label       | [Coffee (coffee or any related flavor – e.g. espresso, latte, cappuccino, etc.)] When you now use an electronic vapor product/When you last used an electronic vapor product, what flavor(s) did you usually use? |
|                     | Measurement | Nominal                                                                                                                                                                                                           |
| Valid Values        | 0           | No                                                                                                                                                                                                                |
|                     | 1           | Yes                                                                                                                                                                                                               |
| Missing Values      | -9          | Refused                                                                                                                                                                                                           |

**ECFLV\_2\_4**

|                     |             | Value                                                                                                                                                                                                              |
|---------------------|-------------|--------------------------------------------------------------------------------------------------------------------------------------------------------------------------------------------------------------------|
| Standard Attributes | Label       | [Candy or dessert flavors (e.g. caramel, vanilla, chocolate, ice cream, mud pie)] When you now use an electronic vapor product/When you last used an electronic vapor product, what flavor(s) did you usually use? |
|                     | Measurement | Nominal                                                                                                                                                                                                            |
| Valid Values        | 0           | No                                                                                                                                                                                                                 |
|                     | 1           | Yes                                                                                                                                                                                                                |
| Missing Values      | -9          | Refused                                                                                                                                                                                                            |

**ECFLV\_2\_5**

|                     |             | Value                                                                                                                                                                   |
|---------------------|-------------|-------------------------------------------------------------------------------------------------------------------------------------------------------------------------|
| Standard Attributes | Label       | [Spice (e.g. clove, cinnamon, nutmeg)] When you now use an electronic vapor product/When you last used an electronic vapor product, what flavor(s) did you usually use? |
|                     | Measurement | Nominal                                                                                                                                                                 |
| Valid Values        | 0           | No                                                                                                                                                                      |
|                     | 1           | Yes                                                                                                                                                                     |
| Missing Values      | -9          | Refused                                                                                                                                                                 |

ECFLV\_2\_6

|                     |             | Value                                                                                                                                                                                                                                  |
|---------------------|-------------|----------------------------------------------------------------------------------------------------------------------------------------------------------------------------------------------------------------------------------------|
| Standard Attributes | Label       | [Alcohol or cocktail (e.g. wine, bourbon, rum, brandy, tequila, whiskey, beer, mai-tai, daiquiri)]<br>When you now use an electronic vapor product/When you last used an electronic vapor product, what flavor(s) did you usually use? |
|                     | Measurement | Nominal                                                                                                                                                                                                                                |
| Valid Values        | 0           | No                                                                                                                                                                                                                                     |
|                     | 1           | Yes                                                                                                                                                                                                                                    |
| Missing Values      | -9          | Refused                                                                                                                                                                                                                                |

**ECFLV\_2\_7**

|                     |             | Value                                                                                                                                                                                                                     |
|---------------------|-------------|---------------------------------------------------------------------------------------------------------------------------------------------------------------------------------------------------------------------------|
| Standard Attributes | Label       | [A non-alcoholic drink or beverage (such as soda, energy drinks, or other beverages)]<br>When you now use an electronic vapor product/When you last used an electronic vapor product, what flavor(s) did you usually use? |
|                     | Measurement | Nominal                                                                                                                                                                                                                   |
| Valid Values        | 0           | No                                                                                                                                                                                                                        |
|                     | 1           | Yes                                                                                                                                                                                                                       |
| Missing Values      | -9          | Refused                                                                                                                                                                                                                   |

**ECFLV\_2\_8**

|                     |             | Value                                                                                                                                             |
|---------------------|-------------|---------------------------------------------------------------------------------------------------------------------------------------------------|
| Standard Attributes | Label       | [Tobacco flavor] When you now use an electronic vapor product/When you last used an electronic vapor product, what flavor(s) did you usually use? |
|                     | Measurement | Nominal                                                                                                                                           |
| Valid Values        | 0           | No                                                                                                                                                |
|                     | 1           | Yes                                                                                                                                               |
| Missing Values      | -9          | Refused                                                                                                                                           |



**ECFLV\_2\_9**

|                     |             | Value                                                                                                                                            |
|---------------------|-------------|--------------------------------------------------------------------------------------------------------------------------------------------------|
| Standard Attributes | Label       | [Unflavored]<br>When you now use an electronic vapor product/When you last used an electronic vapor product, what flavor(s) did you usually use? |
|                     | Measurement | Nominal                                                                                                                                          |
| Valid Values        | 0           | No                                                                                                                                               |
|                     | 1           | Yes                                                                                                                                              |
| Missing Values      | -9          | Refused                                                                                                                                          |

**ECFLV\_2\_10**

|                     |             | Value                                                                                                                                                             |
|---------------------|-------------|-------------------------------------------------------------------------------------------------------------------------------------------------------------------|
| Standard Attributes | Label       | [Some other flavor (specify)]<br>When you now use an electronic vapor product/When you last used an electronic vapor product, what flavor(s) did you usually use? |
|                     | Measurement | Nominal                                                                                                                                                           |
| Valid Values        | 0           | No                                                                                                                                                                |
|                     | 1           | Yes                                                                                                                                                               |
| Missing Values      | -9          | Refused                                                                                                                                                           |

**CGQTATPY\_2**

|                     |             | Value                                                                                                                                                                                           |
|---------------------|-------------|-------------------------------------------------------------------------------------------------------------------------------------------------------------------------------------------------|
| Standard Attributes | Label       | In total, how many times since August 2015 have you tried to quit smoking cigarettes completely? If you have not tried to quit smoking cigarettes completely since August 2015, please enter 0. |
|                     | Measurement | Scale                                                                                                                                                                                           |
| Labeled Values      | -9          | Refused                                                                                                                                                                                         |

**CGQSPY1\_2**

|                     |             | Value                                                                                                              |
|---------------------|-------------|--------------------------------------------------------------------------------------------------------------------|
| Standard Attributes | Label       | [Gave up cigarettes all at once?]<br>Since August 2015, have you done any of the following to try to quit smoking? |
|                     | Measurement | Nominal                                                                                                            |
| Valid Values        | 0           | No                                                                                                                 |
|                     | 1           | Yes                                                                                                                |
| Missing Values      | -9          | Refused                                                                                                            |

**CGQSPY2\_2**

|                     |             | Value                                                                                                                |
|---------------------|-------------|----------------------------------------------------------------------------------------------------------------------|
| Standard Attributes | Label       | [Gradually cut back on cigarettes?]<br>Since August 2015, have you done any of the following to try to quit smoking? |
|                     | Measurement | Nominal                                                                                                              |
| Valid Values        | 0           | No                                                                                                                   |
|                     | 1           | Yes                                                                                                                  |
| Missing Values      | -9          | Refused                                                                                                              |

**CGQSPY3\_2**

|                     |             | Value                                                                                                                                                                                                                                                               |
|---------------------|-------------|---------------------------------------------------------------------------------------------------------------------------------------------------------------------------------------------------------------------------------------------------------------------|
| Standard Attributes | Label       | [Switched completely to electronic vapor products such as e-cigarettes, vape-pens, hookah-pens, electronic hookahs (e-hookahs), electronic cigars (e-cigars), electronic pipes (e-pipes), or e-vaporizers?]<br>Since August 2015, have you done any of the followin |
|                     | Measurement | Nominal                                                                                                                                                                                                                                                             |
| Valid Values        | 0           | No                                                                                                                                                                                                                                                                  |
|                     | 1           | Yes                                                                                                                                                                                                                                                                 |
| Missing Values      | -9          | Refused                                                                                                                                                                                                                                                             |

CGQSPY4\_2

|                     |             | Value                                                                                                                                                                                                                                                            |
|---------------------|-------------|------------------------------------------------------------------------------------------------------------------------------------------------------------------------------------------------------------------------------------------------------------------|
| Standard Attributes | Label       | [Substituted some of my regular cigarettes with electronic vapor products, such as e-cigarettes, vape-pens, hookah-pens, electronic hookahs (e-hookahs), electronic cigars (e-cigars), electronic pipes (e-pipes), e-vaporizers, or tanks?] Since August 2015, h |
|                     | Measurement | Nominal                                                                                                                                                                                                                                                          |
| Valid Values        | 0           | No                                                                                                                                                                                                                                                               |
|                     | 1           | Yes                                                                                                                                                                                                                                                              |
| Missing Values      | -9          | Refused                                                                                                                                                                                                                                                          |

**CGQSPY5\_2**

|                     |             | Value                                                                                                                                                         |
|---------------------|-------------|---------------------------------------------------------------------------------------------------------------------------------------------------------------|
| Standard Attributes | Label       | [Switched to mild or some other brand of cigarettes to try to quit smoking?]<br>Since August 2015, have you done any of the following to try to quit smoking? |
|                     | Measurement | Nominal                                                                                                                                                       |
| Valid Values        | 0           | No                                                                                                                                                            |
|                     | 1           | Yes                                                                                                                                                           |
| Missing Values      | -9          | Refused                                                                                                                                                       |

**CGQSPY6a\_2**

|                     |             | Value                                                                                                                                                                                                              |
|---------------------|-------------|--------------------------------------------------------------------------------------------------------------------------------------------------------------------------------------------------------------------|
| Standard Attributes | Label       | [Used nicotine replacements like the nicotine patch, nicotine gum, nicotine lozenges, nicotine nasal spray, or nicotine inhaler?]<br>Since August 2015, have you done any of the following to try to quit smoking? |
|                     | Measurement | Nominal                                                                                                                                                                                                            |
| Valid Values        | 0           | No                                                                                                                                                                                                                 |
|                     | 1           | Yes                                                                                                                                                                                                                |
| Missing Values      | -9          | Refused                                                                                                                                                                                                            |

**CGQSPY6b\_2**

|                     |             | Value                                                                                                                                                           |
|---------------------|-------------|-----------------------------------------------------------------------------------------------------------------------------------------------------------------|
| Standard Attributes | Label       | [Used medications like Wellbutrin, Zyban, bupropion, Chantix, or varenicline?]<br>Since August 2015, have you done any of the following to try to quit smoking? |
|                     | Measurement | Nominal                                                                                                                                                         |
| Valid Values        | 0           | No                                                                                                                                                              |
|                     | 1           | Yes                                                                                                                                                             |
| Missing Values      | -9          | Refused                                                                                                                                                         |

**CGQSPY7\_2**

|                     |             | Value                                                                                                                                                                                                                                                              |
|---------------------|-------------|--------------------------------------------------------------------------------------------------------------------------------------------------------------------------------------------------------------------------------------------------------------------|
| Standard Attributes | Label       | [Got counseling, help from a telephone help or quit line, a website such as Smokefree.gov, books, pamphlets, videos, a quit tobacco clinic, class, or support group, or an internet or web-based program, or from a doctor or other health professional?]<br>Since |
|                     | Measurement | Nominal                                                                                                                                                                                                                                                            |

**CGQSPY7\_2**

|                |    | Value   |
|----------------|----|---------|
| Valid Values   | 0  | No      |
|                | 1  | Yes     |
| Missing Values | -9 | Refused |

**CGQSPY8\_2**

|                     |             | Value                                                                                                                                                                   |
|---------------------|-------------|-------------------------------------------------------------------------------------------------------------------------------------------------------------------------|
| Standard Attributes | Label       | [Used little cigars, filtered cigars or cigarillos to try to quit smoking cigarettes?]<br>Since August 2015, have you done any of the following to try to quit smoking? |
|                     | Measurement | Nominal                                                                                                                                                                 |
| Valid Values        | 0           | No                                                                                                                                                                      |
|                     | 1           | Yes                                                                                                                                                                     |
| Missing Values      | -9          | Refused                                                                                                                                                                 |

**CGQSPY9\_2**

|                     |             | Value                                                                                                                                                                                                                                              |
|---------------------|-------------|----------------------------------------------------------------------------------------------------------------------------------------------------------------------------------------------------------------------------------------------------|
| Standard Attributes | Label       | [Used any of the following: traditional cigars, snus, chewing tobacco, dip or snuff, dissolvables, hookah, or "heat-not-burn" to try to quit smoking cigarettes?]<br>Since August 2015, have you done any of the following to try to quit smoking? |
|                     | Measurement | Nominal                                                                                                                                                                                                                                            |
| Valid Values        | 0           | No                                                                                                                                                                                                                                                 |
|                     | 1           | Yes                                                                                                                                                                                                                                                |
| Missing Values      | -9          | Refused                                                                                                                                                                                                                                            |

**CGQSPY10\_2**

|                     |             | Value                                                                                                                                                               |
|---------------------|-------------|---------------------------------------------------------------------------------------------------------------------------------------------------------------------|
| Standard Attributes | Label       | [Relied on the support of friends and family to help you quit smoking cigarettes?]<br>Since August 2015, have you done any of the following to try to quit smoking? |
|                     | Measurement | Nominal                                                                                                                                                             |
| Valid Values        | 0           | No                                                                                                                                                                  |
|                     | 1           | Yes                                                                                                                                                                 |
| Missing Values      | -9          | Refused                                                                                                                                                             |



**CGQS1\_2**

|                     |             | Value                                                                                                                                                      |
|---------------------|-------------|------------------------------------------------------------------------------------------------------------------------------------------------------------|
| Standard Attributes | Label       | [Gave up cigarettes all at once?]<br>Now, think about the time you quit smoking for good. When you quit smoking for good, did you do any of the following? |
|                     | Measurement | Nominal                                                                                                                                                    |
| Valid Values        | 0           | No                                                                                                                                                         |
|                     | 1           | Yes                                                                                                                                                        |
| Missing Values      | -9          | Refused                                                                                                                                                    |

**CGQS2\_2**

|                     |             | Value                                                                                                                                                        |
|---------------------|-------------|--------------------------------------------------------------------------------------------------------------------------------------------------------------|
| Standard Attributes | Label       | [Gradually cut back on cigarettes?]<br>Now, think about the time you quit smoking for good. When you quit smoking for good, did you do any of the following? |
|                     | Measurement | Nominal                                                                                                                                                      |
| Valid Values        | 0           | No                                                                                                                                                           |
|                     | 1           | Yes                                                                                                                                                          |
| Missing Values      | -9          | Refused                                                                                                                                                      |

CGQS3\_2

|                     |             | Value                                                                                                                                                                                                                                                            |
|---------------------|-------------|------------------------------------------------------------------------------------------------------------------------------------------------------------------------------------------------------------------------------------------------------------------|
| Standard Attributes | Label       | [Switched completely to electronic vapor products, such as e-cigarettes, vape-pens, hookah-pens, electronic hookahs (e-hookahs), electronic cigars (e-cigars), electronic pipes (e-pipes), e-vaporizers, or tanks?] Now, think about the time you quit smoking f |
|                     | Measurement | Nominal                                                                                                                                                                                                                                                          |
| Valid Values        | 0           | No                                                                                                                                                                                                                                                               |
|                     | 1           | Yes                                                                                                                                                                                                                                                              |
| Missing Values      | -9          | Refused                                                                                                                                                                                                                                                          |

CGQS4\_2

|                     |             | Value                                                                                                                                                                                                                                                            |
|---------------------|-------------|------------------------------------------------------------------------------------------------------------------------------------------------------------------------------------------------------------------------------------------------------------------|
| Standard Attributes | Label       | [Substituted some of my regular cigarettes with electronic vapor products, such as e-cigarettes, vape-pens, hookah-pens, electronic hookahs (e-hookahs), electronic cigars (e-cigars), electronic pipes (e-pipes), e-vaporizers, or tanks?] Now, think about the |
|                     | Measurement | Nominal                                                                                                                                                                                                                                                          |
| Valid Values        | 0           | No                                                                                                                                                                                                                                                               |
|                     | 1           | Yes                                                                                                                                                                                                                                                              |
| Missing Values      | -9          | Refused                                                                                                                                                                                                                                                          |

CGQS6a\_2

|                     |             | Value                                                                                                                                                                                                                                                   |
|---------------------|-------------|---------------------------------------------------------------------------------------------------------------------------------------------------------------------------------------------------------------------------------------------------------|
| Standard Attributes | Label       | [Used nicotine replacements like the nicotine patch, nicotine gum, nicotine lozenges, nicotine nasal spray, or nicotine inhaler?] Now, think about the time you quit smoking for good. When you quit smoking for good, did you do any of the following? |
|                     | Measurement | Nominal                                                                                                                                                                                                                                                 |
| Valid Values        | 0           | No                                                                                                                                                                                                                                                      |
|                     | 1           | Yes                                                                                                                                                                                                                                                     |
| Missing Values      | -9          | Refused                                                                                                                                                                                                                                                 |

**CGQS6b\_2**

|                     |             | Value                                                                                                                                                                                                   |
|---------------------|-------------|---------------------------------------------------------------------------------------------------------------------------------------------------------------------------------------------------------|
| Standard Attributes | Label       | [Used medications like Wellbutrin, Zyban, bupropion, Chantix, or varenicline?]<br>Now, think about the time you quit smoking for good. When you quit smoking for good, did you do any of the following? |
|                     | Measurement | Nominal                                                                                                                                                                                                 |
| Valid Values        | 0           | No                                                                                                                                                                                                      |
|                     | 1           | Yes                                                                                                                                                                                                     |
| Missing Values      | -9          | Refused                                                                                                                                                                                                 |

**CGQS7\_2**

|                     |       | Value                                                                                                                                                                                                                                                               |
|---------------------|-------|---------------------------------------------------------------------------------------------------------------------------------------------------------------------------------------------------------------------------------------------------------------------|
| Standard Attributes | Label | [Got counseling, help from a telephone help or quit line, a website such as Smokefree.gov, books, pamphlets, videos, a quit tobacco clinic, class, or support group, or an internet or web-based program, or from a doctor or other health professional?]<br>Now, t |

**CGQS7\_2**

|                |             | Value   |
|----------------|-------------|---------|
|                | Measurement | Nominal |
| Valid Values   | 0           | No      |
|                | 1           | Yes     |
| Missing Values | -9          | Refused |

**CGQS8\_2**

|                     |             | Value                                                                                                                                                                                                    |
|---------------------|-------------|----------------------------------------------------------------------------------------------------------------------------------------------------------------------------------------------------------|
| Standard Attributes | Label       | [Used little cigars, filtered cigars or cigarillos to quit smoking cigarettes?]<br>Now, think about the time you quit smoking for good. When you quit smoking for good, did you do any of the following? |
|                     | Measurement | Nominal                                                                                                                                                                                                  |
| Valid Values        | 0           | No                                                                                                                                                                                                       |
|                     | 1           | Yes                                                                                                                                                                                                      |
| Missing Values      | -9          | Refused                                                                                                                                                                                                  |

CGQS9\_2

|                     |             | Value                                                                                                                                                                                                                                                             |
|---------------------|-------------|-------------------------------------------------------------------------------------------------------------------------------------------------------------------------------------------------------------------------------------------------------------------|
| Standard Attributes | Label       | [Used any of the following: traditional cigars, snus, chewing tobacco, dip or snuff, dissolvables, hookah, or "heat-not-burn" to quit smoking cigarettes?]<br>Now, think about the time you quit smoking for good. When you quit smoking for good, did you do any |
|                     | Measurement | Nominal                                                                                                                                                                                                                                                           |
| Valid Values        | 0           | No                                                                                                                                                                                                                                                                |
|                     | 1           | Yes                                                                                                                                                                                                                                                               |
| Missing Values      | -9          | Refused                                                                                                                                                                                                                                                           |

**CGQS10\_2**

|                     |             | Value                                                                                                                                                                                                       |
|---------------------|-------------|-------------------------------------------------------------------------------------------------------------------------------------------------------------------------------------------------------------|
| Standard Attributes | Label       | [Relied on the support of friends and family to help you quit smoking cigarettes?]<br>Now, think about the time you quit smoking for good. When you quit smoking for good, did you do any of the following? |
|                     | Measurement | Nominal                                                                                                                                                                                                     |
| Valid Values        | 0           | No                                                                                                                                                                                                          |
|                     | 1           | Yes                                                                                                                                                                                                         |
| Missing Values      | -9          | Refused                                                                                                                                                                                                     |

**ECRESN4\_2**

|                     |             | Value                                                                                                                                                                                                                                                               |
|---------------------|-------------|---------------------------------------------------------------------------------------------------------------------------------------------------------------------------------------------------------------------------------------------------------------------|
| Standard Attributes | Label       | [Electronic vapor products could help me quit smoking regular cigarettes]<br>The next questions are about the reasons people use electronic vapor products. For each reason listed, please indicate how important it is to you in your use of electronic vapor prod |
|                     | Measurement | Nominal                                                                                                                                                                                                                                                             |



ECRESN4\_2

|                |    | Value                |
|----------------|----|----------------------|
| Valid Values   | 0  | Not at all important |
|                | 1  | _1                   |
|                | 2  | _2                   |
|                | 3  | _3                   |
|                | 4  | _4                   |
|                | 5  | _5                   |
|                | 6  | Very important       |
| Missing Values | -9 | Refused              |
